# Supplementary material
Source: publisher figshare collection journal article supplement (https://asha.figshare.com/articles/dataset/_/6170249)
Supplement: Supplementary file 1 [file 1]

*Supplemental Appendix G*  
**Instances of Inaccurate Plural Form Productions**

|                 | P1                         | P2          | P3         | P4          |
|-----------------|----------------------------|-------------|------------|-------------|
| Probe #         | Gx Probe #3<br>Gx Probe #4 | BL# 4       | BL#4       | BL#4        |
| Response/target | Geese/goose                | Geese/goose | Wasps/wasp | Geese/goose |
