# Supplementary material
Source: publisher figshare collection journal article supplement (https://asha.figshare.com/articles/dataset/_/6170249)
Supplement: Supplementary file 2 [file 1]

## *Supplemental Appendix A* **Participant Stimuli**

### **Participant 1 Stimuli**

#### Set 1: Birds & Furniture

##### 1. SFA treatment items

magpie  
puffin  
pigeon  
flamingo  
crib  
stool  
coatrack  
recliner

##### 2. Generalization-RExp+PF

goose  
roadrunner  
cardinal  
hummingbird  
playpen  
frame  
dresser  
wastebasket

##### 3. Generalization-RExp

canary  
hawk  
seagull  
bluebird  
cot  
throne  
hammock  
chandelier

##### 4. Generalization-LimExp

ostrich  
swan  
vulture  
woodpecker  
hutch  
futon  
nightstand  
ottoman

#### Set 2: Zoo Animals & Clothing

##### 1. SFA treatment items

zebra  
hippo  
antelope  
alligator  
blouse  
nightgown  
earmuffs  
sombrero

##### 2. Generalization-RExp+PF

panther  
beaver  
hyena  
koala  
bonnet  
tracksuit  
miniskirt  
pajamas

##### 3. Generalization-RExp

skunk  
rhino  
giraffe  
kangaroo  
robe  
blazer  
overalls  
cardigan

##### 4. Generalization-LimExp

wolf  
panda  
raccoon  
porcupine  
scarf  
bowtie  
corset  
tuxedo

### Set 3: Insects and Musical Instruments

#### 1. Generalization-RExp

moth  
cockroach  
dragonfly  
wasp  
drum  
flute  
banjo  
accordion

### Participant 2 Stimuli

#### Set 1: Zoo Animals & Clothing

##### 1. SFA treatment items

bat  
beaver  
panther  
hyena  
belt  
socks  
mittens  
nightgown

##### 2. Generalization- RExp+PF

seal  
goat  
kangaroo  
giraffe  
vest  
boots  
shorts  
suspenders

##### 3. Generalization- RExp

hippo  
zebra  
elephant  
porcupine  
jacket  
blouse  
bathrobe  
earmuffs

##### 4. Generalization- LimExp

wolf  
tiger  
cougar  
lion  
purse  
scarf  
tuxedo  
sandals

#### Set 2: Birds & Furniture

##### 1. SFA treatment items

goose  
cardinal  
parrot  
hummingbird  
lamp  
dresser  
bookcase  
wastebasket

##### 2. Generalization- RExp+PF

eagle  
swan  
vulture  
woodpecker  
stool  
chair  
curtain  
recliner

3. Generalization- RExp

hawk  
owl  
crow  
bluebird  
pillow  
crib  
hammock  
chandelier

4. Generalization- LimExp

turkey  
dove  
flamingo  
magpie  
frame  
rug  
nightstand  
ottoman

Set 3: Insects and Musical Instruments

1. Generalization- RExp

spider  
butterfly  
ant  
cockroach  
guitar  
drum  
banjo  
flute

**Participant 3 Stimuli**

Set 1: Birds & Furniture

1. SFA treatment items

magpie  
puffin  
pigeon  
flamingo  
crib  
stool  
coatrack  
recliner

2. Generalization- RExp+PF

goose  
roadrunner  
cardinal  
hummingbird  
playpen  
frame  
dresser  
wastebasket

3. Generalization- RExp

canary  
hawk  
seagull  
bluebird  
cot  
throne  
hammock  
chandelier

4. Generalization- LimExp

ostrich  
swan  
vulture  
woodpecker  
hutch  
futon  
nightstand  
ottoman

## Set 2: Zoo Animals & Clothing

### 1. SFA treatment items

zebra  
hippo  
antelope  
alligator  
blouse  
nightgown  
earmuffs  
sombrero

### 2. Generalization- RExp+PF

panther  
beaver  
hyena  
koala  
bonnet  
tracksuit  
miniskirt  
pajamas

### 3. Generalization- RExp

skunk  
rhino  
giraffe  
kangaroo  
robe  
blazer  
overalls  
cardigan

### 4. Generalization- LimExp

wolf  
panda  
raccoon  
porcupine  
scarf  
bowtie  
corset  
tuxedo

## Set 3: Insects and Musical Instruments

### 1. Generalization- RExp

moth  
cockroach  
dragonfly  
wasp  
drum  
flute  
banjo  
accordion

## Participant 4 Stimuli

### Set 1: Birds & Furniture

#### 1. SFA treatment items

puffin  
pigeon  
flamingo  
magpie  
coatrack  
stool  
credenza  
recliner

#### 2. Generalization- RExp+PF

goose  
cardinal  
roadrunner  
ostrich  
playpen  
shutters  
dresser  
wastebasket

3. Generalization- RExp

canary  
hawk  
seagull  
bluebird  
cot  
throne  
futon  
chandelier

4. Generalization- LimExp

hummingbird  
swan  
vulture  
woodpecker  
hutch  
hammock  
nightstand  
ottoman

Set 2: Zoo Animals & Clothing

2. SFA treatment items

anteater  
antelope  
panther  
sloth  
bathrobe  
sombrero  
leotard  
earmuff

2. Generalization- RExp+PF

skunk  
rhino  
armadillo  
gekko  
nightgown  
miniskirt  
tracksuit  
fedora

3. Generalization- RExp

otter  
lemur  
alligator  
warthog  
bonnet  
blazer  
overalls  
cardigan

4. Generalization- LimExp

panda  
koala  
hyena  
porcupine  
bowtie  
corset  
poncho  
tuxedo

Set 3: Insects and Musical Instruments

1. Generalization- RExp

dragonfly  
praying mantis  
cockroach  
moth  
accordion  
saxophone  
banjo  
tambourine

## Participant 5 Stimuli

### Set 1: Zoo Animals & Clothing

#### 2. SFA treatment items

bat  
zebra  
panther  
skunk  
bathrobe  
earmuff  
blouse  
nightgown

#### 2. Generalization- RExp+PF

beaver  
rhino  
wolf  
antelope  
pajamas  
jacket  
purse  
socks

#### 3. Generalization- RExp

hippo  
giraffe  
kangaroo  
alligator  
cardigan  
overalls  
blazer  
bonnet

#### 4. Generalization- LimExp

hyena  
panda  
porcupine  
lion  
shorts  
scarf  
tuxedo  
tie

### Set 2: Birds & Furniture

#### 2. SFA treatment items

flamingo  
pigeon  
parrot  
magpie  
lamp  
crib  
stool  
coatrack

#### 2. Generalization- RExp+PF

goose  
cardinal  
roadrunner  
hummingbird  
playpen  
frame  
dresser  
wastebasket

#### 3. Generalization- RExp

hawk  
owl  
seagull  
bluebird  
chair  
curtain  
hammock  
chandelier

#### 4. Generalization- LimExp

ostrich  
swan  
vulture  
turkey  
rug  
pillow  
nightstand  
ottoman

### Set 3: Insects and Musical Instruments

#### 1. Generalization- RExp

ant

moth

dragonfly

cockroach

guitar

drum

banjo

flute
