# Supplementary material
Source: publisher figshare collection journal article supplement (https://asha.figshare.com/articles/dataset/_/6170249)
Supplement: Supplementary file 3 [file 1]

### *Supplemental Appendix C* **Additional Probe Details**

#### **Baseline Phase Probes**

Confrontation naming of items in Sets 1, 2, and 3 was probed during each baseline session. Items were randomized within set/subset for each presentation. The Sets and subsets were presented in a different order for each baseline, minimizing order effects. The number of baseline probes was extended across participants, with five as the minimum number of probes.

In addition to the requirement of a minimum of five probes, participants could have no more than 38% (3/8) accuracy on treatment set probes, establishing stability. Items with over 38% accuracy were replaced and baseline probing began again as necessary. At least three semantic information probes were completed per participant during the baseline phase.

#### **Treatment Phase Probes**

Probes during the treatment phase were conducted at the beginning of each session prior to treatment. The eight treatment items (e.g., Set 1 treatment ) were randomized and probed after every two treatment sessions, at the beginning of the session (prior to treatment sessions 3, 5, 7, 9 etc.). The sixteen untrained generalization items from the trained set (RExp and RExp+PF) were probed at the beginning of every other session (prior to treatment sessions 2, 4, 6, 8 etc.). During the treatment phases, the second set of items (treatment and untrained generalization items) was probed approximately half way through the first phase, and repeatedly at the end of the first treatment phase. Probing of the second set designated for treatment continued until performance was stable prior to treatment initiation.

LimExp subsets were probed only at the end of each treatment phase.

#### **Maintenance and Follow-up Probes**

The previously treated set (treatment and untreated generalization items) was probed half way, and at the end of the second treatment phase. Follow-up probes for all lists and items were conducted at two and six week intervals after treatment ended.
