# Supplementary material
Source: publisher figshare collection journal article supplement (https://asha.figshare.com/articles/dataset/_/6170249)

# Supplemental Appendix F

## Accuracy of Naming of Experimental Items During Probes for Participant 5

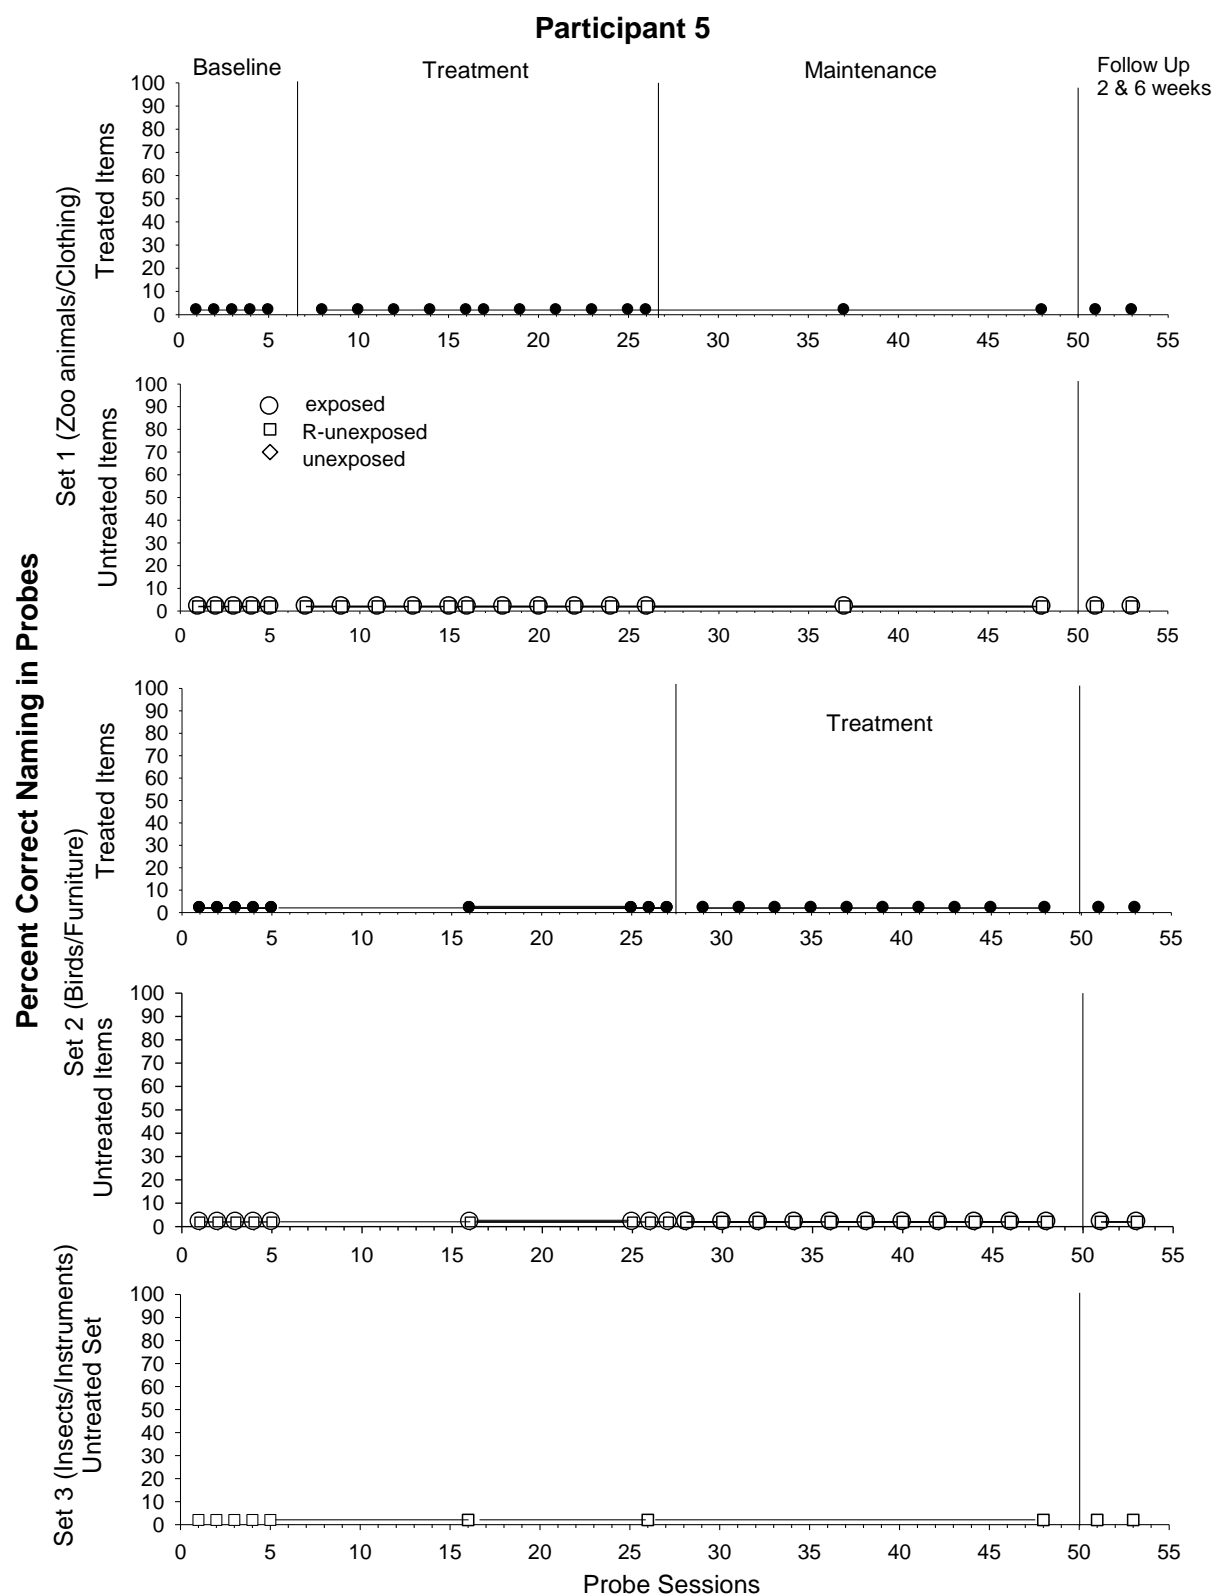

Supplement: Supplementary file 4 [file 1]
