# Supplementary material
Source: publisher figshare collection journal article supplement (https://asha.figshare.com/articles/dataset/_/6170249)

# *Supplemental Appendix E* **Accuracy of Naming of Experimental Items During Probes for Participant 4 Including Probes During Extended Treatment**

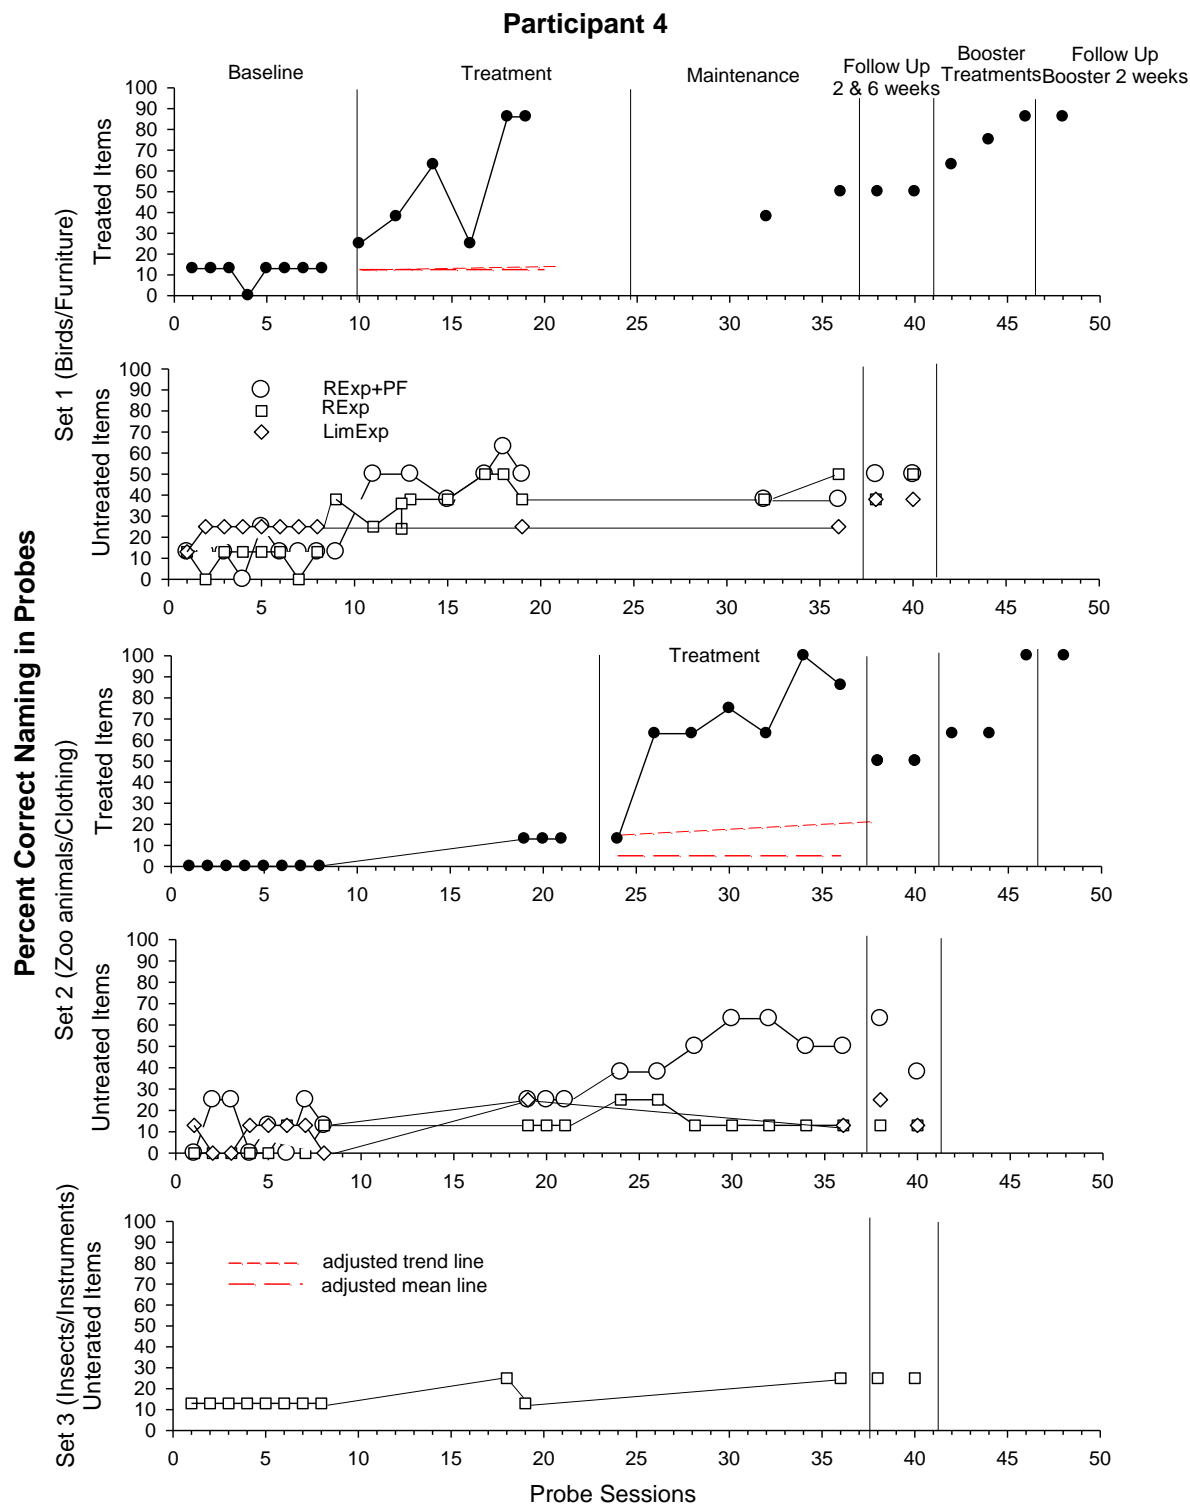

Supplement: Supplementary file 5 [file 1]
