# Supplementary material
Source: publisher figshare collection journal article supplement (https://asha.figshare.com/articles/dataset/_/6170249)
Supplement: Supplementary file 6 [file 1]

## *Appendix D*

### **Example Transcriptions With SIUs Underlined**

#### Participant 1

1. Zebra-um he has four xx legs um he has um force he has um ze no white and black um xxx xx has kail a tail and something
2. Rhino- um he has four um legs he has um gray and its whsl wasl stum rough on du on du sides and um he's dut corn two forms on um two ears two hears horns das it horns
3. Tracksuit- warm warm things um a pants about uh dat has lastic on dis front and um uh button nu um zipper on du thing on whatever it's black on du arms and red on du the tings I don't know it and uh uh zipper on the front um

#### Participant 2

1. Wastebasket- and this is a they're called they're in your bedroom or in your be or in your house put them on in your kitchen or wh or the're bathroom floor or bathroom the baste for a basket a base a basebasket uh I can't say the namebas bask xx bascar they call them you bath your kitchen they're bathroom they call em they call em other sorts of things I can't say
2. Hippo - this one too is a himpo hippo it's a hippo it's himpio I can't say himipa I can't say it's full name casue it's too big a word hip hippo it's hippo and they live in Africa and they have lots of x they h they usually have lots of they live they they live inside they don't live in on them in the water but they hang in it all the time and then they'll sleep outside they'll go out the around there with the um hi like the hipir oh now I can't think or their name again hi hippo hip he's a hippp hipia yeah ok and um they just eat they usually just eat the food that they er this jus they usually just eat um what uh food er uh what kinds of things can't think iof the name how to feed them anyway ok
3. Belt- these are they're called they're called for th they are called for a bek you wear them on your clothes you put them on your pants to hold them up and you call em they are called they er ba I can't say their name they're um you hold em with their with your be your bre your bleaks I can't think of the name though

#### Participant 3

1. Cot- army tent sleeping
2. Woodpecker- bird uh worms scared of man and woman
3. Tracksuit- mens sweatpants and sweatshirt training weights fitness

#### Participant 4

1. Bathrobe- ok this um is a bathrub uh bathrobe and this is um you put like you put in your either before or after just sleep or just sleep before and after sleep and makes ya um like you have a shower nice and warmer or or when you get up put ya nice and warm when you get your breakfast or whatever x x warm at the time
2. Panda- ok this is a um panda and um it's white and black well it the face looks like looks like a bear it big and fat and um small ears and um the face the face is all white but the ears and eyes are black and the little nose is black and then it then it's face like white and black with the middle part er the legs are all black and the back part is white and um it's um it's from at the zoo or it's from I can't think what it's from um it's a different country now I can't remember exactly where the country though

3. Dragonfly- this is like a um like a butterfly but it's not a butterfly but it's but um but it flies uh he's got four um it's like a butterfly I don 't know what it's called though but it flies on that or it can walks and it's kinda on the on the um um I don't know what these are called though but it's not the arms though anyway but it's clear but the face is green and the body is really long and thin and it's kinda blue

#### Participant 5

1. Magpie- cart on a mek tore henna uh leaz on a xx mm he like all this time ki lie line tot here and uh he likes just x x side //that's about all
2. Crib- are kinas x xx x she makes are she uses sight parsuper um that's about the same pure x //
3. Rhino- oh boy they got their x fers a dock and and she had her walker up du day and go the all do it around makes her makes her top she does x x pretty hide make the du big hard x x taper on //
