# Supplementary material
Source: publisher figshare collection journal article supplement (https://asha.figshare.com/articles/dataset/_/6170249)
Supplement: Supplementary file 7 [file 1]

## Supplemental Appendix B

### Examples of Error Responses during Baseline Probes for Each Participant

#### Participant 1

| <u>Target</u> | <u>Response</u> |
|---------------|-----------------|
| magpie        | bagpie          |
| puffin        | I don't know    |
| pigeon        | penguin         |
| flamingo      | fabingo         |
| coatrack      | coarag          |
| stool         | skool           |
| crib          | cwib            |
| recliner      | recider         |
| alligator     | crosadile       |
| antelope      | deer            |
| zebra         | sebu            |
| hippo         | hislapot        |
| sombrero      | soburu          |
| nightgown     | gown something  |
| earmuffs      | muff something  |

#### Participant 2

| <u>Target</u> | <u>Response</u>         |
|---------------|-------------------------|
| goose         | go over all the time    |
| cardinal      | it's the redder for the |
| parrot        | pakaw                   |
| hummingbird   | hippie or a             |
| lamp          | lamper                  |
| dresser       | I don't know            |
| bookcase      | berbrek                 |
| wastebasket   | bavewood                |
| bat           | bat                     |
| beaver        | bavie                   |
| panther       | liger                   |
| hyena         | hasvena                 |
| belt          | bess                    |
| mittens       | muffs                   |
| nightgown     | night time              |

#### Participant 3

| <u>Target</u> | <u>Response</u> |
|---------------|-----------------|
| puffin        | bird            |
| pigeon        | bird            |
| flamingo      | f something     |
| magpie        | bird            |
| coatrack      | I don't know    |
| stool         | stool           |
| crib          | baby bedroom    |
| recliner      | chair           |
| zebra         | zeba            |
| antelope      | deer            |
| panther       | bobcat          |
| skunk         | stinky          |
| bathrobe      | towel           |
| blouse        | sweater         |

#### Participant 4

| <u>Target</u> | <u>Response</u>              |
|---------------|------------------------------|
| puffin        | bird                         |
| pigeon        | green bird                   |
| magpie        | mapie                        |
| flamingo      | flounders                    |
| coatrack      | hangers                      |
| stool         | stool                        |
| credenza      | furniture put radio in there |
| recliner      | swing chair                  |
| anteater      | I don't know                 |
| panther       | pander                       |
| skunk         | skun                         |
| bathrobe      | robe                         |
| nightgown     | sleeping dress               |
| leotard       | leo                          |

### **Participant 5**

| <u>Target</u> | <u>Response</u> |
|---------------|-----------------|
| pigeon        | twigin          |
| crib          | know it baby    |
| magpie        | kay             |
| lamp          | net             |
| stool         | know it         |
| parrot        | big breder      |
| coatrack      | minap           |
| flamingo      | zalar           |
| bat           | bucket          |
| zebra         | baser           |
| bathrobe      | howert          |
| earmuff       | foves           |
| nightgown     | blackersaker    |
| blouse        | soundeth        |
